# Supplementary material for: Restoration of Vegetation Greenness and Possible Changes in Mature Forest Communities in Two Forests Damaged by the Vaia Storm in Northern Italy
Source: MDPI journal article supplement (doi:10.3390/plants12061369), 2023-03-19
Supplement: s1 [file s1]

**Table S1** Syntaxonomic scheme and other quoted syntaxa

|                                                                                                                                                                                                                                                                                                                                                                                                                                                                                                                                                                                                                                                                                                                                                                                                                                                                                                                                                                                                                                                                                                                                 |
|---------------------------------------------------------------------------------------------------------------------------------------------------------------------------------------------------------------------------------------------------------------------------------------------------------------------------------------------------------------------------------------------------------------------------------------------------------------------------------------------------------------------------------------------------------------------------------------------------------------------------------------------------------------------------------------------------------------------------------------------------------------------------------------------------------------------------------------------------------------------------------------------------------------------------------------------------------------------------------------------------------------------------------------------------------------------------------------------------------------------------------|
| <p><b>VACCINIO-PICEETEA Br.-Bl. in Br.-Bl. et al. 1939</b></p> <p>PICEETALIA EXCELSAE Pawłowski et al. 1928</p> <p>Piceion excelsae Pawłowski et al. 1928</p> <p><u>Vaccinio-Abietenion</u> Oberd. 1962</p> <p><i>Calamagrostio arundinaceae-Piceetum</i> Andreis, Armiraglio, Caccianiga &amp; Cerabolini 2009</p> <p><i>Calamagrostio villosae-Abietetum</i> Ellenberg et Klötzli 1974</p>                                                                                                                                                                                                                                                                                                                                                                                                                                                                                                                                                                                                                                                                                                                                    |
| <p><b>ROBINIETEA Jurko ex Hadac et Sofron 1980</b></p> <p>SAMBUCETALIA RACEMOSAE Oberd. ex Doing 1962</p> <p>Sambuco-Salicion capreae Tüxen et Neumann ex Oberdorfer 1957</p> <p><i>Piceo abietis-Sorbetum aucupariae</i> Oberdorfer 1978</p> <p><i>Rubetum idaei</i> Kaiser 1926</p>                                                                                                                                                                                                                                                                                                                                                                                                                                                                                                                                                                                                                                                                                                                                                                                                                                           |
| <p><b>CRATAEGO-PRUNETEA Tx. 1962</b></p> <p>PRUNETALIA SPINOSAE Tx. 1952</p> <p>Astrantio-Corylion avellanae Passarge 1978</p>                                                                                                                                                                                                                                                                                                                                                                                                                                                                                                                                                                                                                                                                                                                                                                                                                                                                                                                                                                                                  |
| <p>Other quoted phytosociological classes (in alphabetical order):</p> <ul style="list-style-type: none"> <li>• Artemisietea vulgaris Lohmeyer et al. in Tx. ex von Rochow 1951</li> <li>• Asplenietea trichomanis (Br.-Bl. in Meier et Br.-Bl. 1934) Oberd. 1977</li> <li>• Betulo carpaticae-Alnetea viridis Rejmànek ex Bœuf, Theurillat, Willner, Mucina et Simler in Boeuf et al. 2014</li> <li>• Carpino-Fagetea sylvaticae Jakucs ex Passarge 1968</li> <li>• Epilobietea angustifolii Tx. et Preising ex von Rochow 1951</li> <li>• Erico-Pinetea Horvat 1959</li> <li>• Festuco-Brometea Br.-Bl. et Tx. ex Soó 1947</li> <li>• Loiseleurio procumbentis-Vaccinietea Eggler ex Schubert 1960</li> <li>• Molinio-Arrhenatheretea Tx. 1937</li> <li>• Montio-Cardaminetea Br.-Bl. et Tx. ex Klika et Hadač 1944</li> <li>• Mulgedio-Aconitetea Hadac et Klika in Klika et Hadac 1944</li> <li>• Nardetea strictae Rivas Goday et Borja Carbonell in Rivas Goday et Mayor Lòpez 1966</li> <li>• Quercetea robori-petraeae Br.-Bl. et Tx. ex Oberd. 1957</li> <li>• Trifolio-Geranietea sanguinei T. Müller 1962</li> </ul> |
